# Supplementary material
Source: PubMed Central journal article supplement (PMC1599922)
Supplement: pnas_0604130103_2.pdf [file pnas_0604130103_2.pdf]

P-MEK IHC

P-ERK IHC

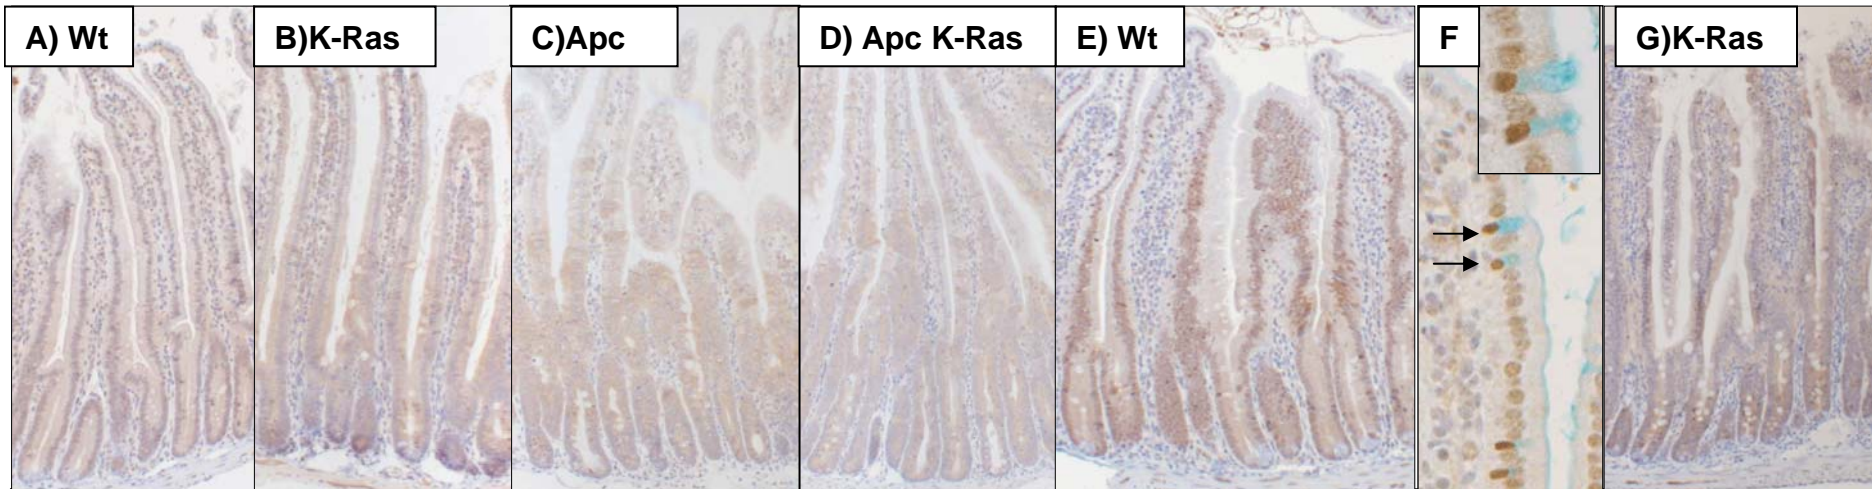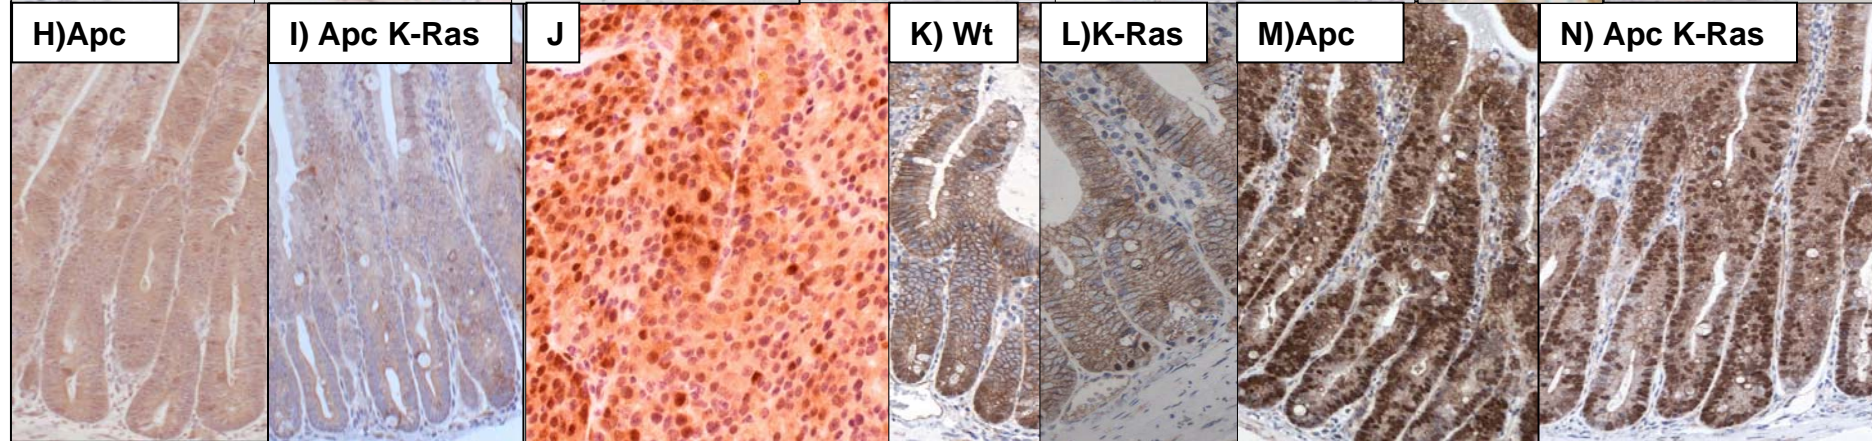

P-ERK IHC

$\beta$ -catenin IHC

APC

APC K-Ras

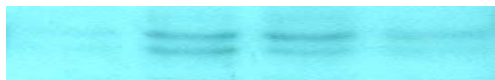

Phospho-ERK1/2

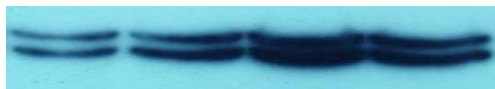

Total ERK1/2

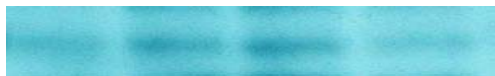

Phospho-MEK1/2

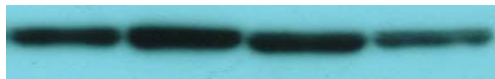

Total MEK1/2

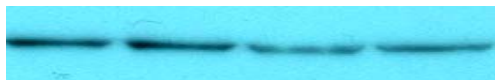

$\beta$ -actin
